# Supplementary material for: LncRNA SH3BP5-AS1 promotes hepatocellular carcinoma progression by sponging miR-6838-5p and activation of PTPN4
Source: publisher site journal article supplement (doi:10.18632/aging.205811), 2024-05-16
Supplement: Supplementary file [file aging-v16i10-205811-supplementary-material-SD1.pdf]

## SUPPLEMENTARY TABLE

**Supplementary Table 1. The information of primers used in this study.**

| <b>Gene</b> | <b>Primer</b> | <b>Sequence (5' to 3')</b> |
|-------------|---------------|----------------------------|
| SH3BP5-AS1  | Forward       | CCGCTCGTGGATCTCATCTG       |
|             | Reverse       | GCATCTTAAGGCTAGCAGGGT      |
| GAPDH       | Forward       | GGAGTCCACTGGCGTCTTCA       |
|             | Reverse       | GTCATGAGTCCTTCCACGATACC    |
| U6          | Forward       | CTCGCTTCGGCAGCACA          |
|             | Reverse       | AACGCTTCACGAATTTGCGT       |
| PTPN4       | Forward       | TCAGAAGATGCCTGTGATTGTGT    |
|             | Reverse       | TGTCCCGACCATTGATCAGTAC     |
| PDK1        | Forward       | CTGTGATACGGATCAGAAACCG     |
|             | Reverse       | TCCACCAAACAATAAAGAGTGCT    |
| PFK1        | Forward       | GGTGCCCGTGTCTTCTTTGT       |
|             | Reverse       | AAGCATCATCGAAACGCTCTC      |
| PKM2        | Forward       | GTCGA AGCCCATAGTGAAG       |
|             | Reverse       | GTGAATCAATGTCCAGGCGG       |
